# Supplementary material for: Pressurized DNA state inside herpes capsids—A novel antiviral target
Source: PubMed Central journal article supplement (PMC7377361; doi:10.1371/journal.ppat.1008604), 2020-07-23
Supplement: ppat.1008604.s002.pdf [file ppat.1008604.s002.pdf]

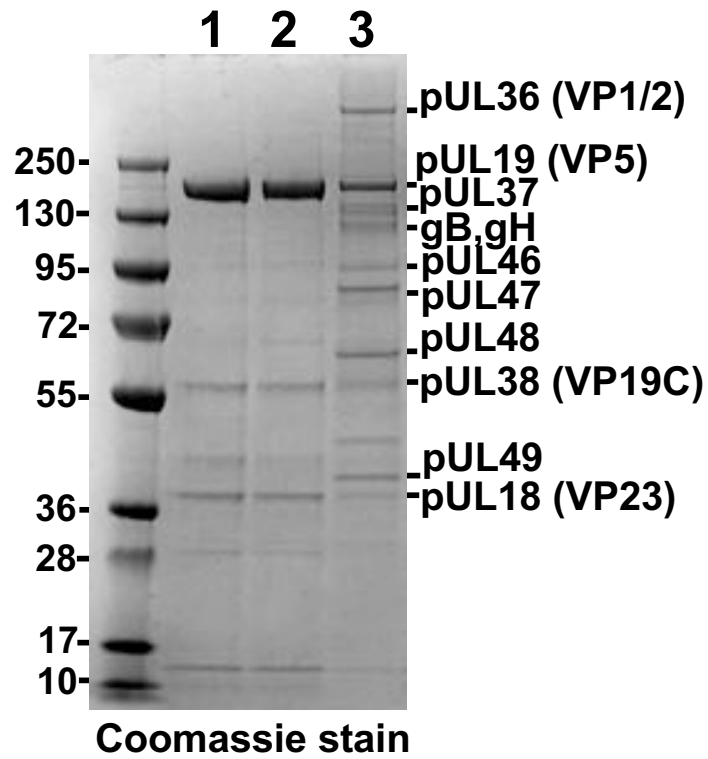

| <b>Tegument proteins</b> | <b>Capsid proteins</b>     | <b>Envelope proteins</b> |
|--------------------------|----------------------------|--------------------------|
| UL36 (VP1/2)<br>UL37     | UL19 (VP5)<br>UL38 (VP19C) | gB                       |
| UL46, UL47,<br>UL48 UL49 | UL18 (VP3)                 | gH                       |

**Fig. S1**
