# Supplementary material for: Pressurized DNA state inside herpes capsids—A novel antiviral target
Source: PubMed Central journal article supplement (PMC7377361; doi:10.1371/journal.ppat.1008604), 2020-07-23
Supplement: ppat.1008604.s004.pdf [file ppat.1008604.s004.pdf]

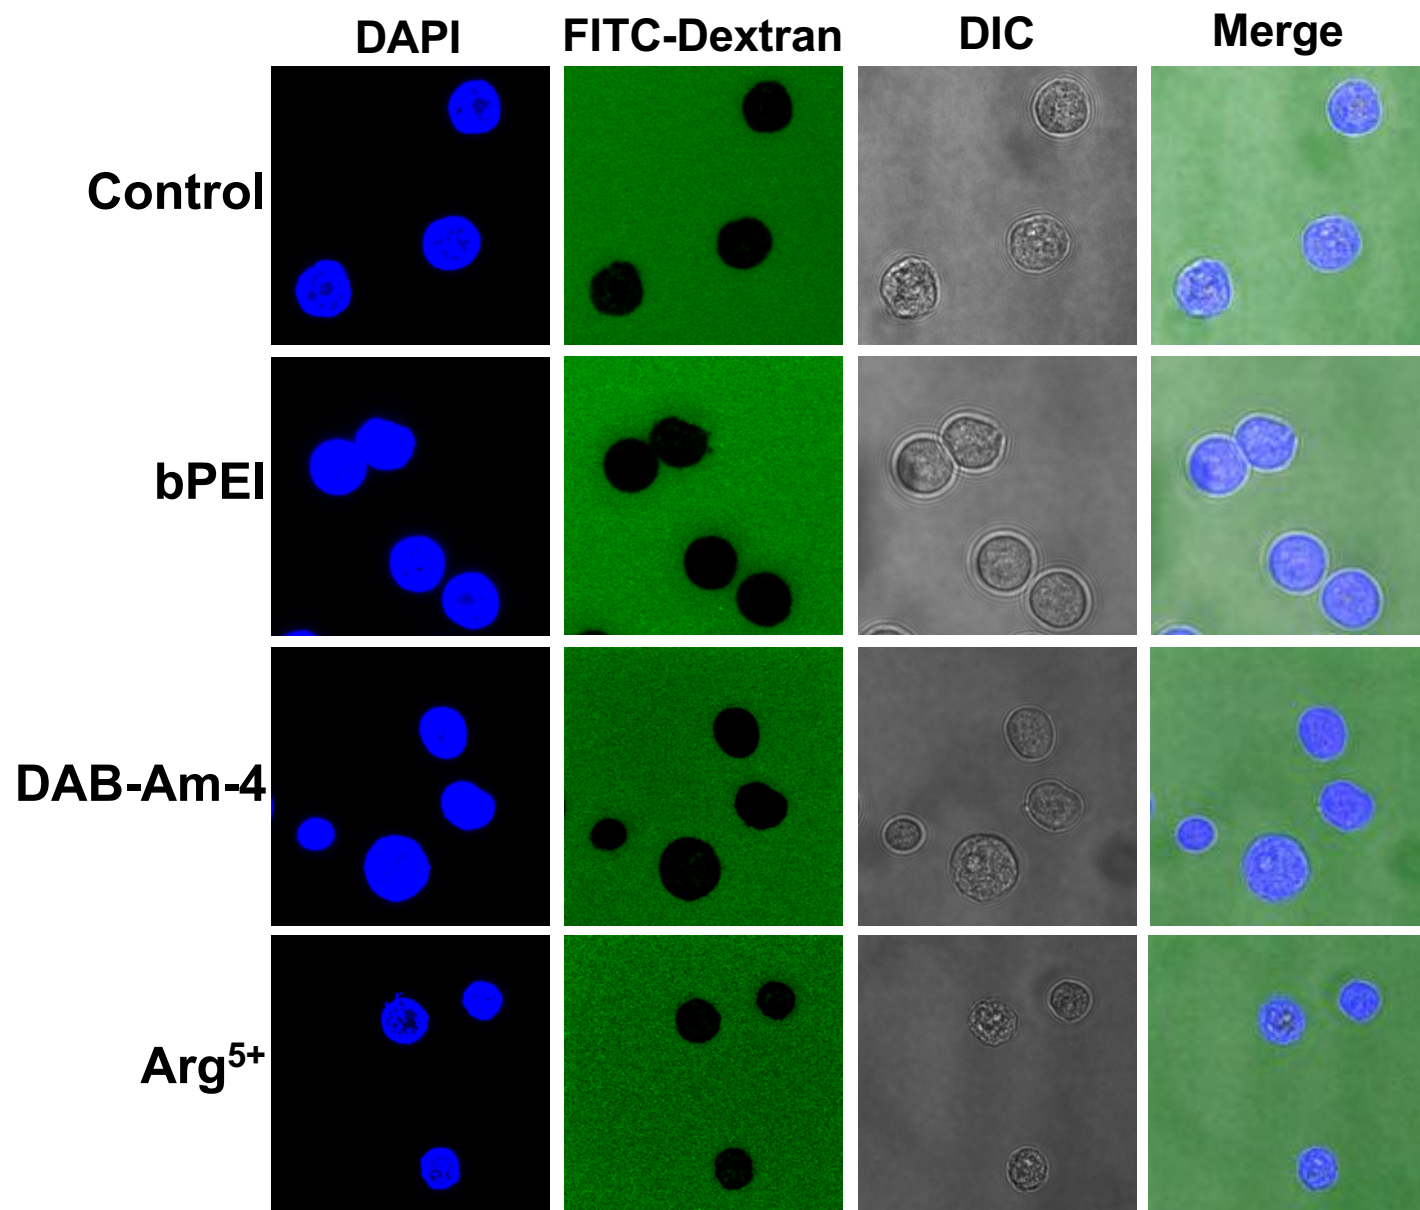

Fig. S3
