# Supplementary material for: Pressurized DNA state inside herpes capsids—A novel antiviral target
Source: PubMed Central journal article supplement (PMC7377361; doi:10.1371/journal.ppat.1008604), 2020-07-23
Supplement: ppat.1008604.s006.pdf [file ppat.1008604.s006.pdf]

**Ultrathin  
Epon section-1**

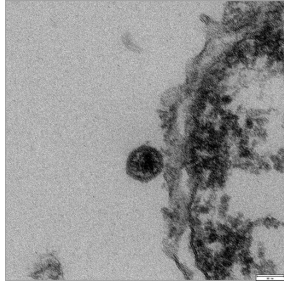

**Ultrathin  
Epon section-2**

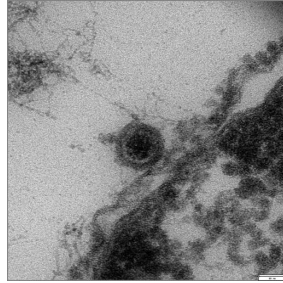

**Ultrathin  
Epon section-3**

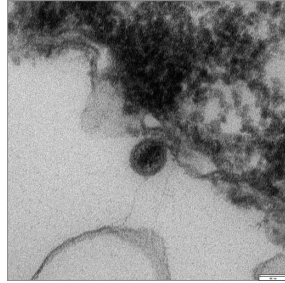

**Ultrathin  
Epon section-4**

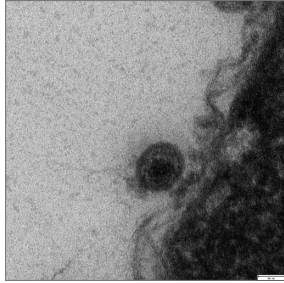

**Ultrathin  
Epon section-5**

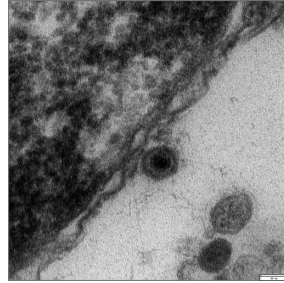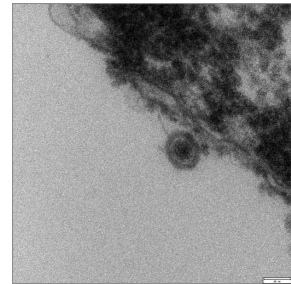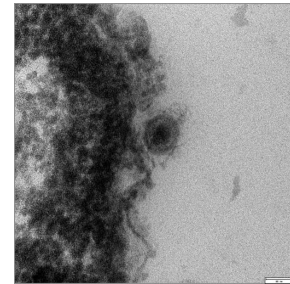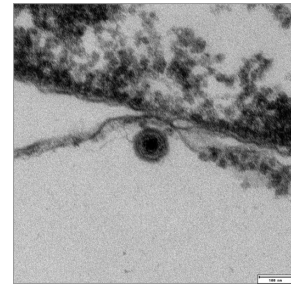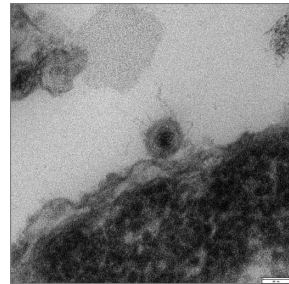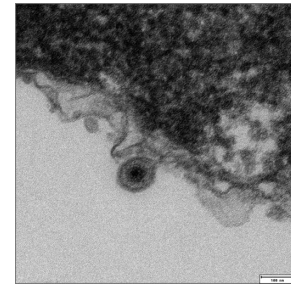

**Ultrathin  
Epon section-6**

**Ultrathin  
Epon section-7**

**Ultrathin  
Epon section-8**

**Ultrathin  
Epon section-9**

**Ultrathin  
Epon section-10**

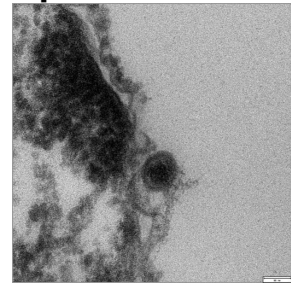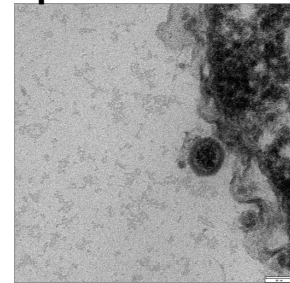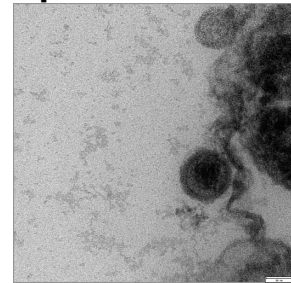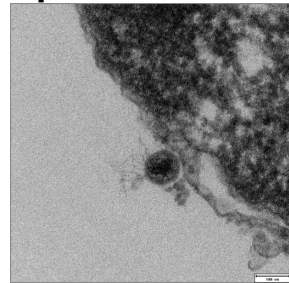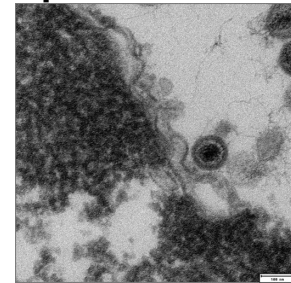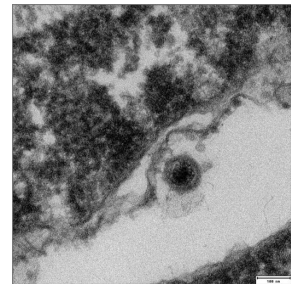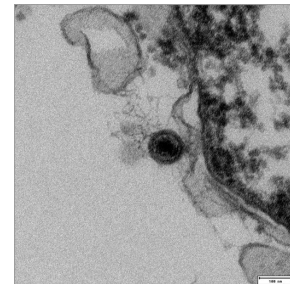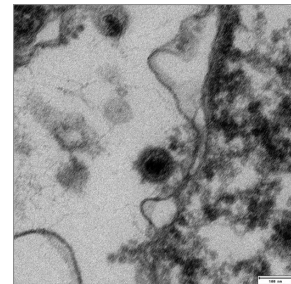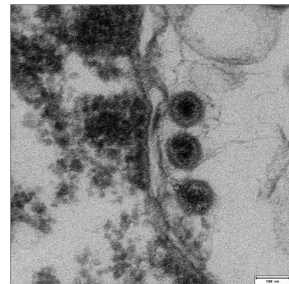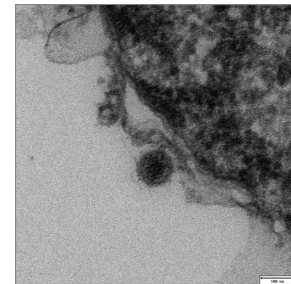

Ultra-thin sectioning EM shows capsids in the absence of compounds (capsids were mixed with nuclei supplemented with cytosol). Negative control at 4°C, without added compounds and without ATP regenerating system, shows that no ejection occurs.

**Ultrathin  
Epon section-1**

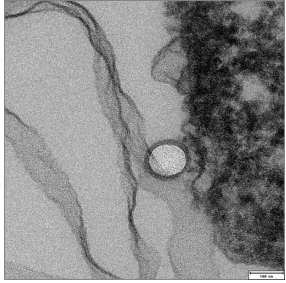

**Ultrathin  
Epon section-2**

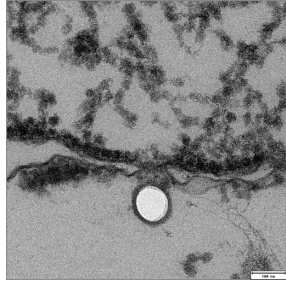

**Ultrathin  
Epon section-3**

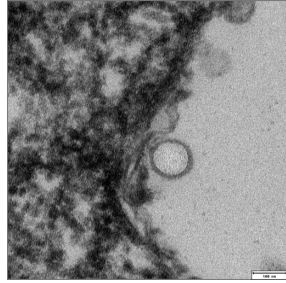

**Ultrathin  
Epon section-4**

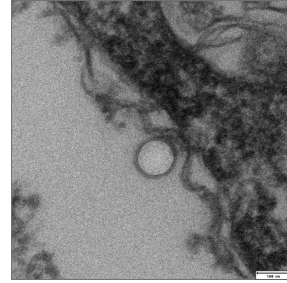

**Ultrathin  
Epon section-5**

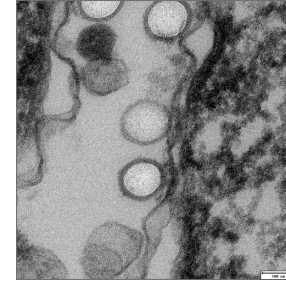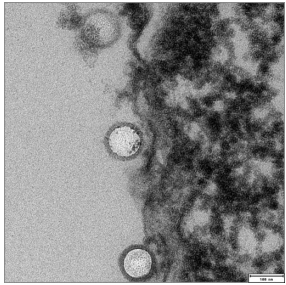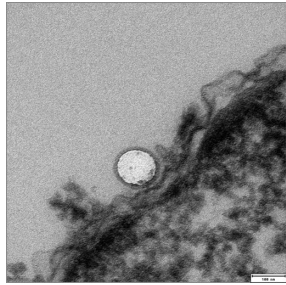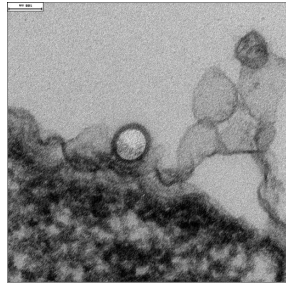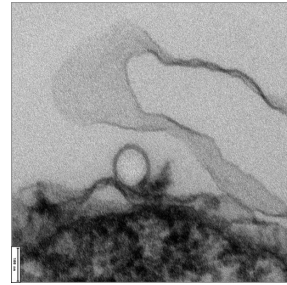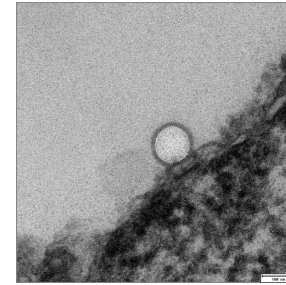

Ultra-thin sectioning EM shows capsids in absence of compounds. Positive control at 37°C shows complete DNA ejection from C-capsids in the absence of compounds (capsids were mixed with nuclei supplemented with cytosol and ATP-regenerating system).

**Ultrathin  
Epon section-1**

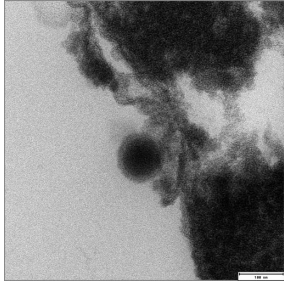

**Ultrathin  
Epon section-2**

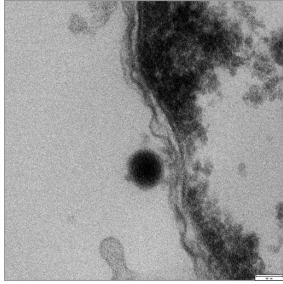

**Ultrathin  
Epon section-3**

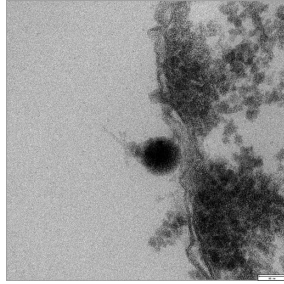

**Ultrathin  
Epon section-4**

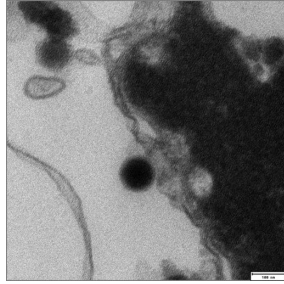

**Ultrathin  
Epon section-5**

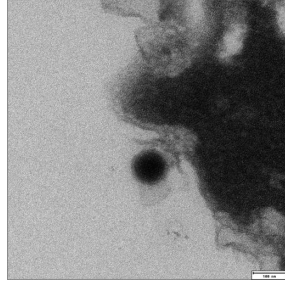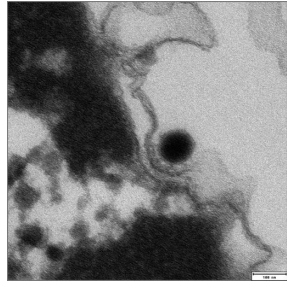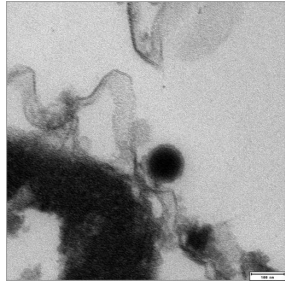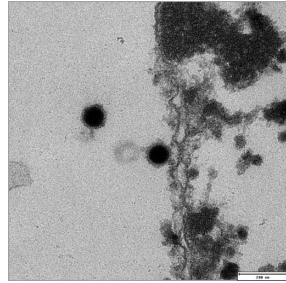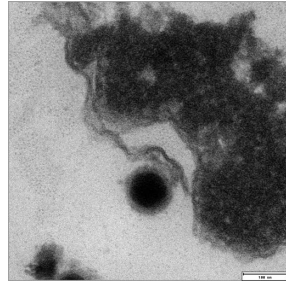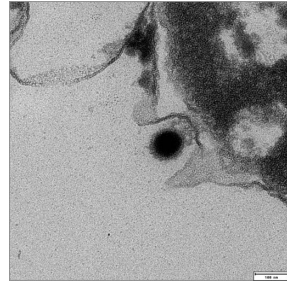

**Ultrathin  
Epon section-6**

**Ultrathin  
Epon section-7**

**Ultrathin  
Epon section-8**

**Ultrathin  
Epon section-9**

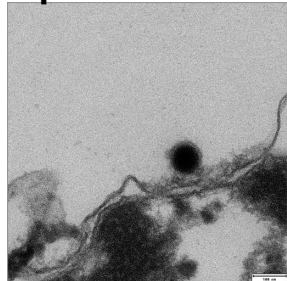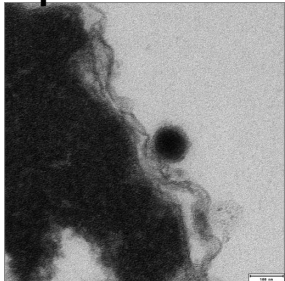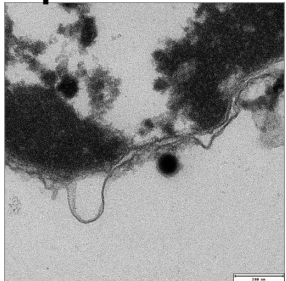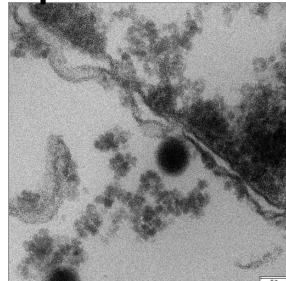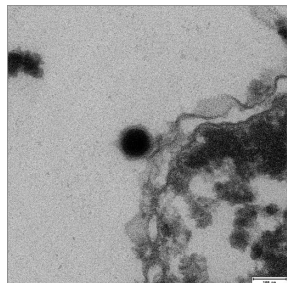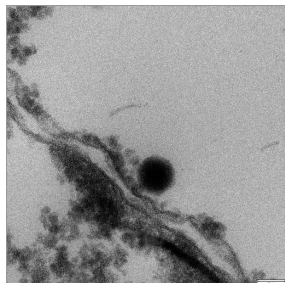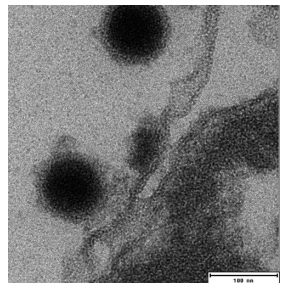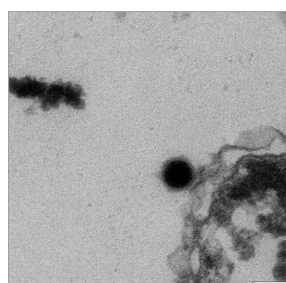

Ultra-thin sectioning EM shows that the addition of the selected DNA condensing compound (bPEI 600) inhibits DNA ejection from HSV-1 C-capsids into a cell nucleus through the NPCs.

**Ultrathin  
Epon section-1**

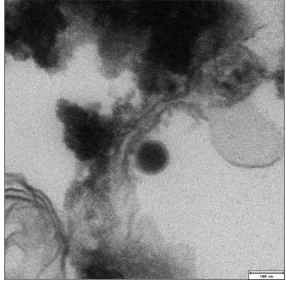

**Ultrathin  
Epon section-2**

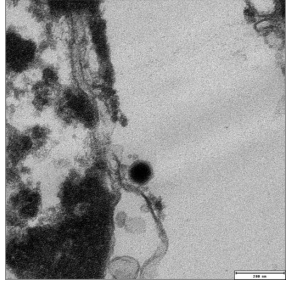

**Ultrathin  
Epon section-3**

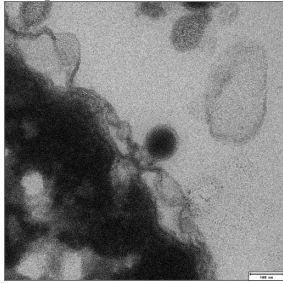

**Ultrathin  
Epon section-4**

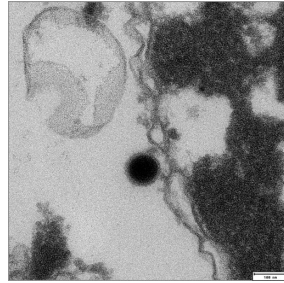

**Ultrathin  
Epon section-5**

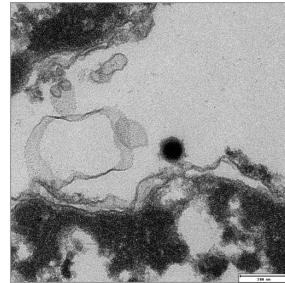

**Ultrathin  
Epon section-6**

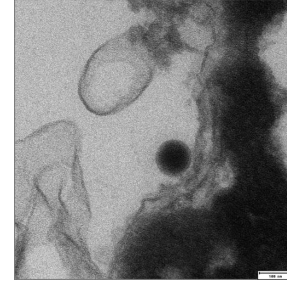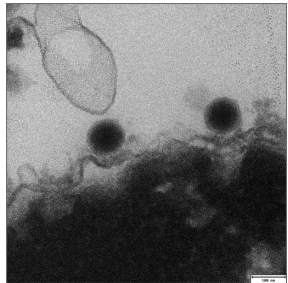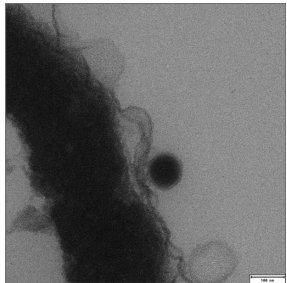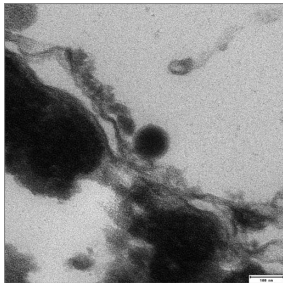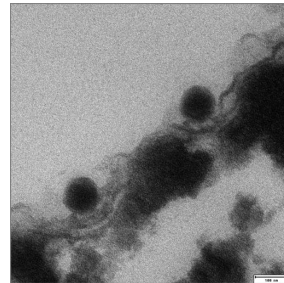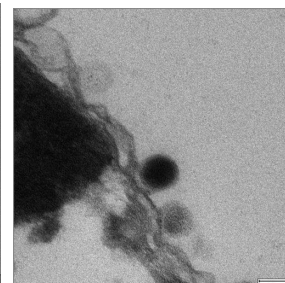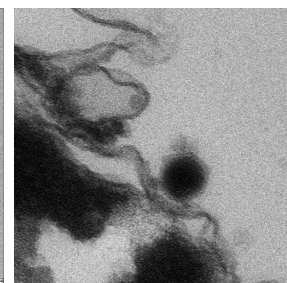

**Ultrathin  
Epon section-7**

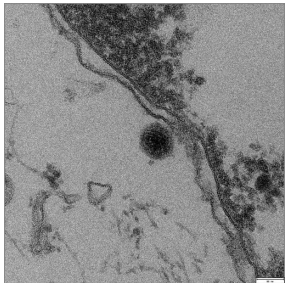

Ultra-thin sectioning EM shows that the addition of the selected DNA condensing compound (DAB-Am-4) inhibits DNA ejection from HSV-1 C-capsids into a cell nucleus through the NPCs.



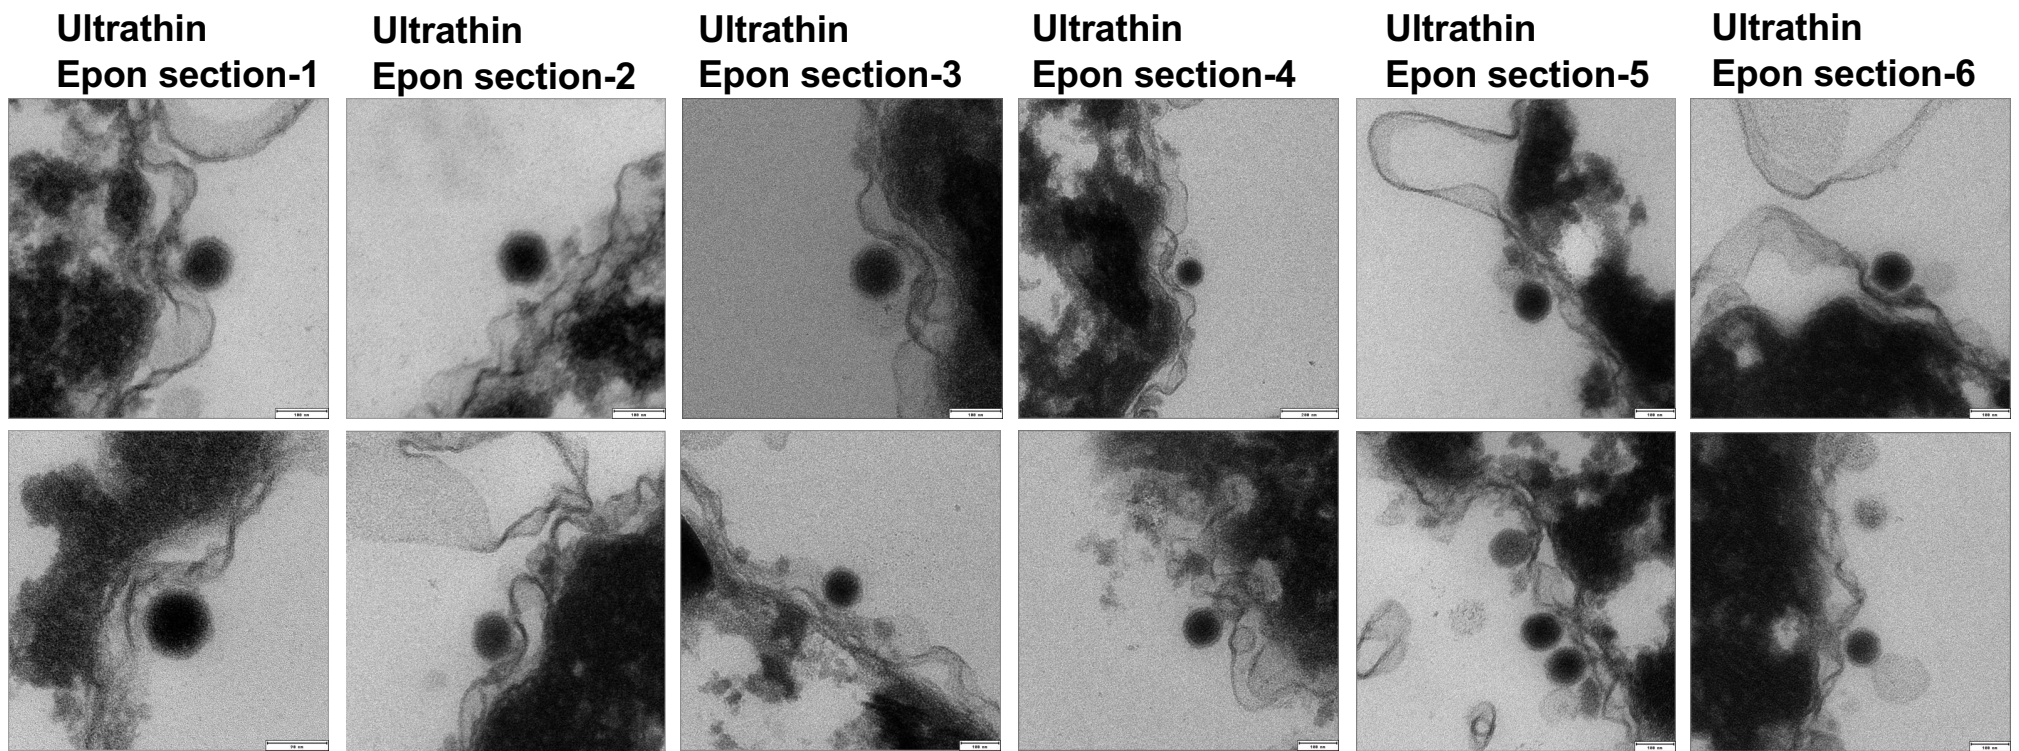

Ultra-thin sectioning EM shows that the addition of the selected DNA condensing compound (Arg5+) inhibits DNA ejection from HSV-1 C-capsids into a cell nucleus through the NPCs.

**Ultrathin  
Epon section-1**

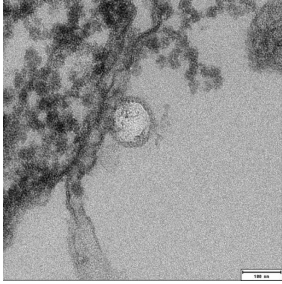

**Ultrathin  
Epon section-2**

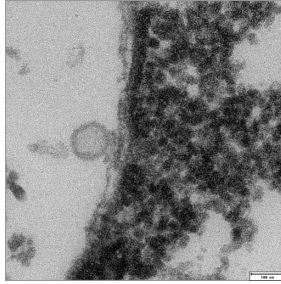

**Ultrathin  
Epon section-3**

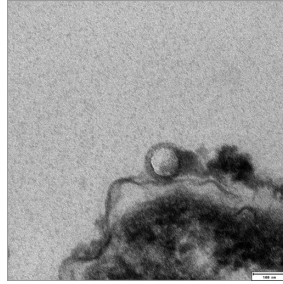

**Ultrathin  
Epon section-4**

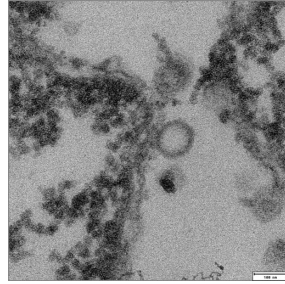

**Ultrathin  
Epon section-5**

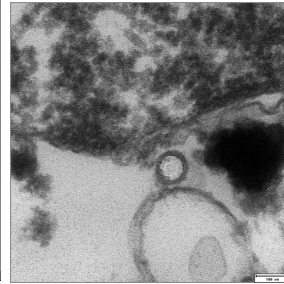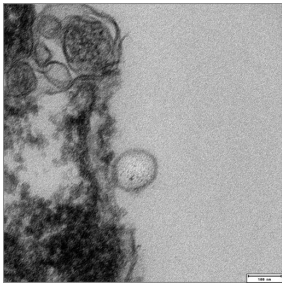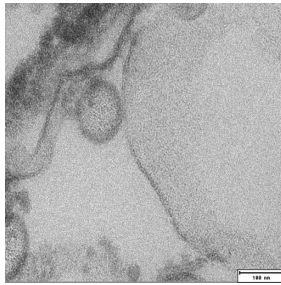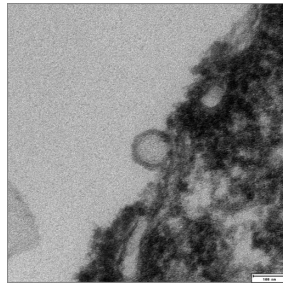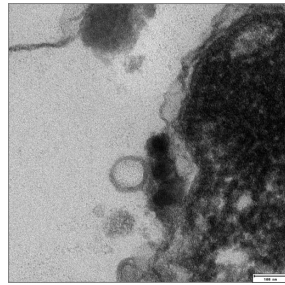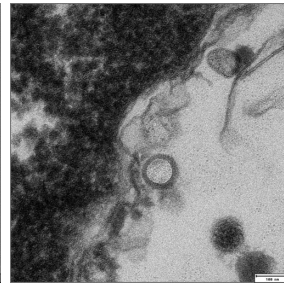

Ultra-thin sectioning EM shows that addition of bPEI 25000 does not inhibit DNA ejection from HSV-1 C-capsids into a cell nucleus through the NPC.

**Ultrathin Epon section-1**   **Ultrathin Epon section-2**   **Ultrathin Epon section-3**   **Ultrathin Epon section-4**   **Ultrathin Epon section-5**

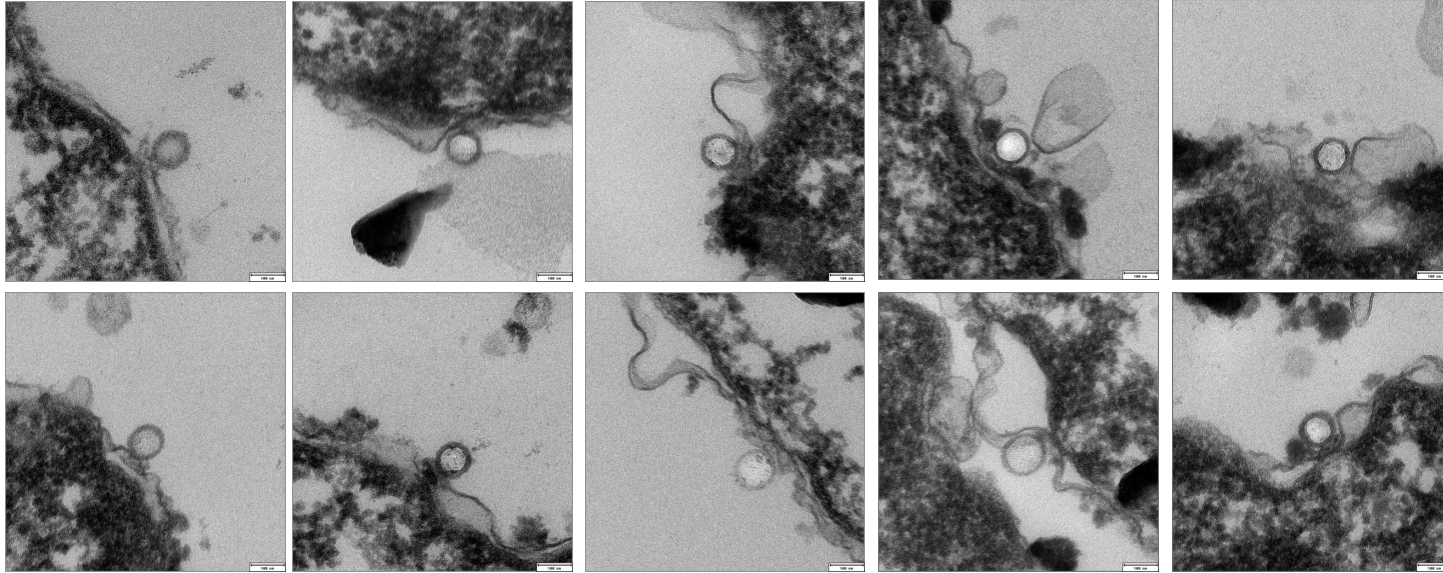

Ultra-thin sectioning EM shows that addition of DAB-Am-64 does not inhibit DNA ejection from HSV-1 C-capsids into a cell nucleus through the NPC.
