# Supplementary material for: Pressurized DNA state inside herpes capsids—A novel antiviral target
Source: PubMed Central journal article supplement (PMC7377361; doi:10.1371/journal.ppat.1008604), 2020-07-23
Supplement: ppat.1008604.s008.pdf [file ppat.1008604.s008.pdf]

**A**

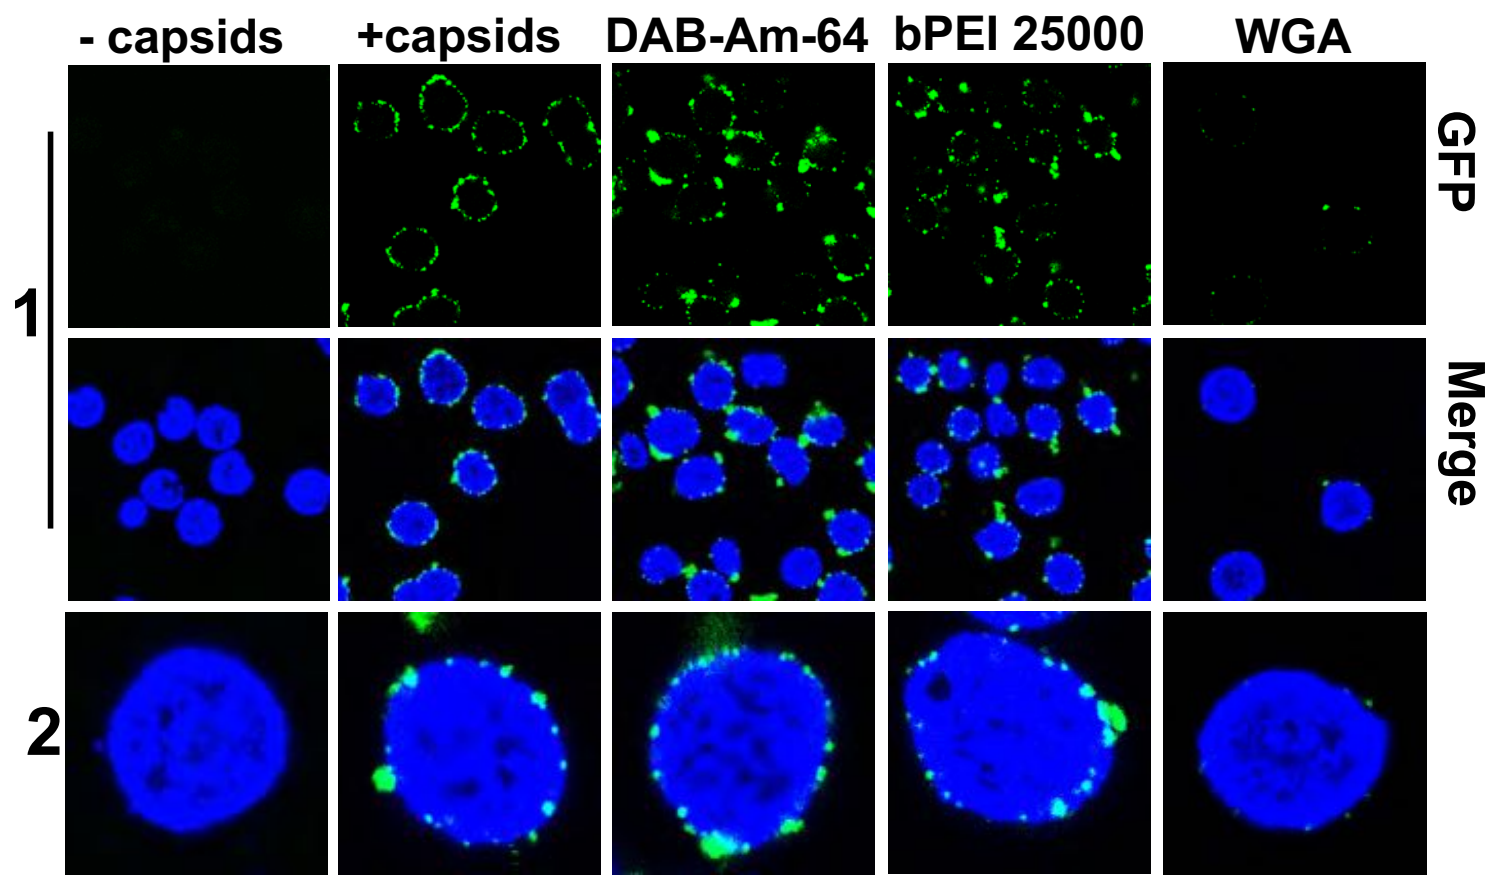

**Fig. S7A**

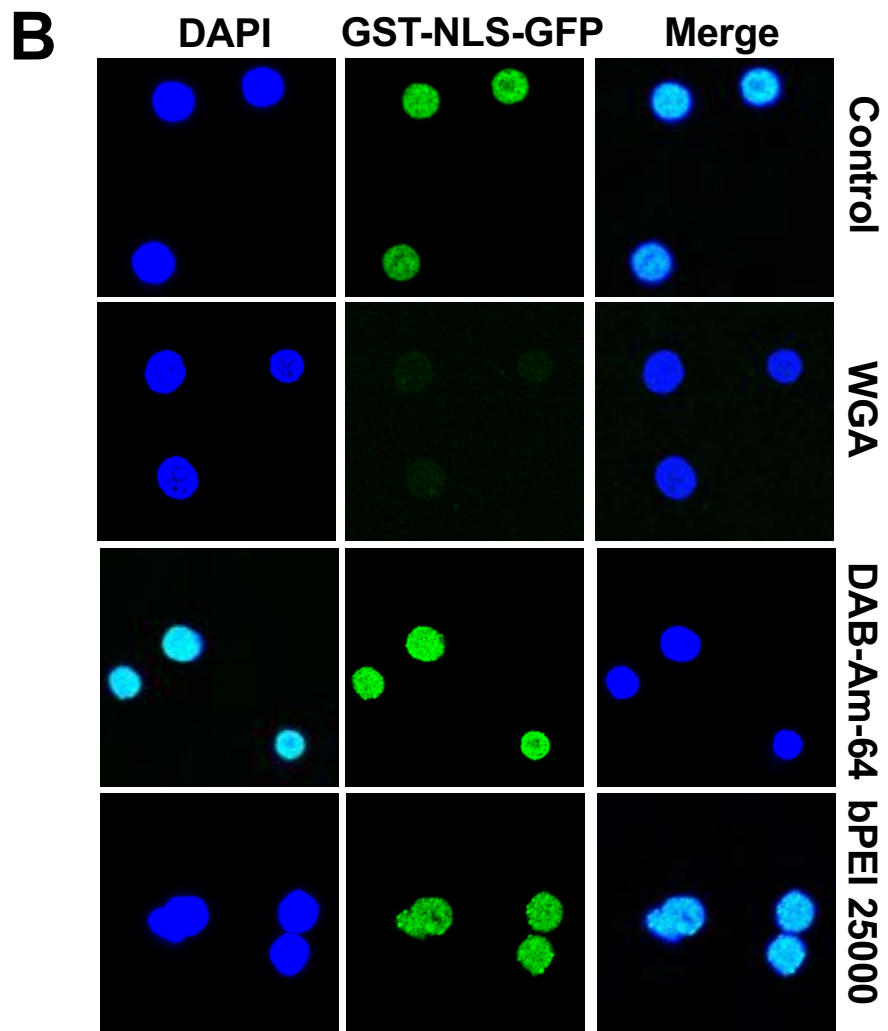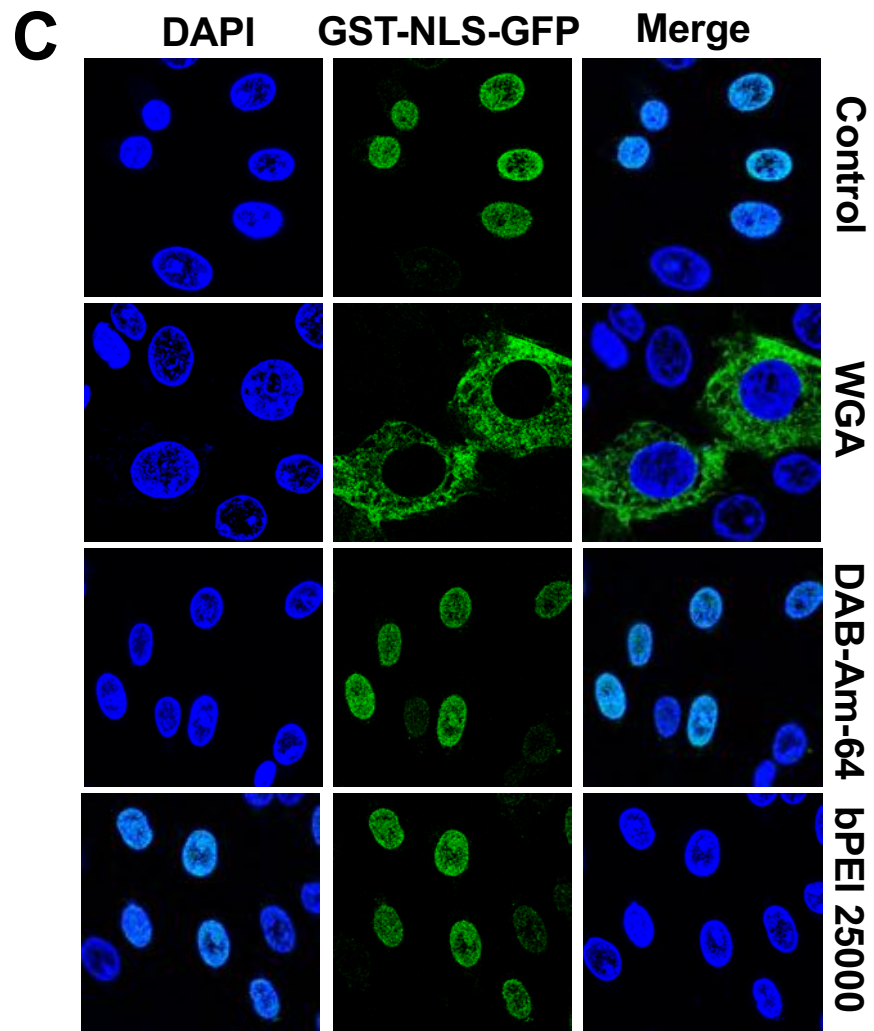

**Figs. S7 B & C**
