# Supplementary material for: Pressurized DNA state inside herpes capsids—A novel antiviral target
Source: PubMed Central journal article supplement (PMC7377361; doi:10.1371/journal.ppat.1008604), 2020-07-23
Supplement: ppat.1008604.s009.pdf [file ppat.1008604.s009.pdf]

## DNA-DNA d-spacing (Å)

| Compound                | Temperature (°C) |              |              |
|-------------------------|------------------|--------------|--------------|
|                         | 15°C             | 22°C         | 37°C         |
| <b>Arg<sup>5+</sup></b> | 29.26 ± 0.01     | 29.39 ± 0.07 | 29.21 ± 0.05 |
| <b>bPEI</b>             | 28.20 ± 0.01     | 28.22 ± 0.01 | 28.19 ± 0.01 |
| <b>DAB-Am-4</b>         | 29.08 ± 0.01     | 29.04 ± 0.01 | 28.55 ± 0.01 |

Table S1
