# Supplementary material for: Pressurized DNA state inside herpes capsids—A novel antiviral target
Source: PubMed Central journal article supplement (PMC7377361; doi:10.1371/journal.ppat.1008604), 2020-07-23
Supplement: ppat.1008604.s010.pdf [file ppat.1008604.s010.pdf]

## DNA-DNA d-spacing (Å)

| Compound          | Temperature (°C) |              |              |
|-------------------|------------------|--------------|--------------|
|                   | 15°C             | 22°C         | 37°C         |
| C-capsid          | 31.31 ± 0.08     | 31.16 ± 0.07 | 31.02 ± 0.12 |
| Arg <sup>5+</sup> | 29.71 ± 0.06     | 29.78 ± 0.05 | 29.86 ± 0.06 |
| bPEI              | 29.48 ± 0.04     | 29.39 ± 0.04 | 29.18 ± 0.04 |
| DAB-Am-4          | 29.78 ± 0.04     | 29.73 ± 0.04 | 29.47 ± 0.05 |

Table S2
