# Supplementary material for: Pressurized DNA state inside herpes capsids—A novel antiviral target
Source: PubMed Central journal article supplement (PMC7377361; doi:10.1371/journal.ppat.1008604), 2020-07-23
Supplement: ppat.1008604.s011.pdf [file ppat.1008604.s011.pdf]

## DNA-DNA d-spacing (Å)

| Compound          | Concentration |              |              |              |
|-------------------|---------------|--------------|--------------|--------------|
|                   | 1X            | 2X           | 2X           | 3X           |
| HSV-1 virion      | 31.03 ± 0.10  | 30.90 ± 0.12 | 31.00 ± 0.06 | 30.99 ± 0.06 |
| Arg <sup>5+</sup> | 30.39 ± 0.09  | 30.27 ± 0.11 | 30.22 ± 0.06 | 30.23 ± 0.05 |
| bPEI              | 30.36 ± 0.09  | 30.51 ± 0.08 | 30.50 ± 0.09 | 30.46 ± 0.11 |
| DAB-Am-4          | 30.18 ± 0.08  | 30.42 ± 0.09 | 30.52 ± 0.09 | 30.52 ± 0.10 |

O.N. incubation

Table S3
